# Supplementary material for: Re-evaluation of the N-terminal substitution and the D-residues of teixobactin
Source: Royal Society of Chemistry journal article supplement (doi:10.1039/c6ra17720d), 2016-01-01
Supplement: c6ra17720d1.pdf [file c6ra17720d1.pdf]

## Re-Evaluation of the N-Terminal Substitution and the D-Residues on Teixobactin

Shimaa A. H. Abdel Monaim,<sup>a</sup> Yahya E. Jad,<sup>a</sup> Gerardo A. Acosta,<sup>b</sup> Tricia Naicker<sup>a</sup>, Estelle J. Ramchuran,<sup>a</sup> Ayman El-Faham<sup>c,d</sup>, Thavendran Govender,<sup>a</sup> Hendrik G. Kruger,<sup>a</sup> Beatriz G. de la Torre,<sup>a</sup> and Fernando Albericio<sup>\*a,b,d,e,f</sup>

*a* Catalysis and Peptide Research Unit, School of Health Sciences, University of KwaZulu-Natal, Durban 4001, South Africa;

*b* CIBER-BBN, Networking Centre on Bioengineering, Biomaterials and Nanomedicine, Barcelona Science Park, 08028-Barcelona, Spain;

*c* Department of Chemistry, Faculty of Science, Alexandria University P.O. Box 426, Ibrahimia, Alexandria 21321, Egypt;

*d* Department of Chemistry, College of Science, King Saud University P.O. Box 2455, Riyadh 11451, Saudi Arabia;

*e* School of Chemistry and Physics, University of KwaZulu-Natal, Durban 4001, South Africa;

*f* Department of Organic Chemistry, University of Barcelona, 08028-Barcelona, Spain.

Author to whom correspondence should be addressed; E-Mails: [albericio@ukzn.ac.za](mailto:albericio@ukzn.ac.za)  
(F.A.)

## Materials

All reagents and solvents were obtained from commercial suppliers and were used without further purification. Analytical HPLC was performed on an Agilent 1100 system, and Chemstation software was used for data processing. Buffer A: 0.1 % trifluoroacetic acid in H<sub>2</sub>O; buffer B: 0.1 % trifluoroacetic acid in CH<sub>3</sub>CN. LC-MS was performed on a Shimadzu 2020 UFLC-MS using an YMC-Triart C<sub>18</sub> (5 µm, 4.6 × 150 mm) column and data processing was carried out by Lab Solution software. Buffer A: 0.1 % formic acid in H<sub>2</sub>O; buffer B: 0.1 % formic acid in CH<sub>3</sub>CN. Crude peptide was purified on Shimadzu LC-8A preparative HPLC using a PhenomenexLumaC<sub>18</sub>(2) column (10 µm, 10 × 250 mm). High resolution mass spectrometry (HRMS) was performed using a Bruker ESI-QTOF mass spectrometer in positive mode.

## Experimental section

### Synthesis of Alloc amino acids<sup>1</sup>

1.68 mL of Alloc-Cl is dissolved in 5 mL of dioxane and 1.54g of sodium azide dissolved in 4 mL of water is added and stirred for 2 hours. Then, 2.5g of N-Ile-OH are dissolved in 50 mL water containing 4g of sodium carbonate is added to the mixture followed by 50mL dioxane. The reaction mixture stirred at rt 24 hours monitoring the pH which should be between 8 and 10. The pH is adjusted by adding sodium carbonate 10%.

Once the reaction is finished, the solvent mixture is evaporated using vacuum evaporator then wash the crude several times using hexane. 100 mL of water is added keeping the pH adjusted to between 9 and 10 and washed (3v X 50mL) with diethylether.

The aqueous phase is acidified with HCl to pH 2 and extracted with DCM, dried with anhydrous magnesium sulfate, the ethyl acetate was evaporated and characterized HPLC, HPL-MS, NMR and they matched the spectra in literature. <sup>2</sup>

## Synthesis of L-Arg analogue of teixobactin

### a) Synthesis of tetrapeptide

166 mg of 2-Cl-Trt resin ( $1.69 \text{ mmol g}^{-1}$ ) was placed in a 10 mL falcon tube and then was preactivated by 10 %  $\text{SOCl}_2$  in DCM for 12 h. The resin was transferred into 10 mL polypropylene syringe fitted with a polyethylene filter disc and washed several times with DCM. Then, it was washed with DCM ( $3 \times 10 \text{ mL}$ , 1 min) followed by adding the first amino acid Fmoc-L-Ala-OH (31 mg, 0.1 mmol) and DIEA ( $174 \mu\text{L}$ , 1 mmol, 10 equiv) in 0.5 mL DCM and shaken for 1 h. Then 100  $\mu\text{L}$  of MeOH was added and shaken for 30 min to ensure full capping of the resin. Then the resin was washed with DMF ( $2 \times 10 \text{ mL}$ , 1 min), DCM ( $2 \times 10 \text{ mL}$ , 1 min), Methanol ( $2 \times 10 \text{ mL}$ , 1 min), DCM ( $2 \times 10 \text{ mL}$ , 1 min) and DMF ( $2 \times 10 \text{ mL}$ , 1 min). Then, Fmoc removal was achieved by 20 % piperidine in DMF ( $2 \times 10 \text{ mL}$ , 5 min). Then, the next amino acids were added by using the following coupling condition:

For coupling: Fmoc-AA-OH/HATU/DIEA (3:3:6) in 1 mL DMF for 30 min

For Fmoc removal: 20 % piperidine in DMF ( $2 \times 10 \text{ mL}$ , 5 min)

Washing: DMF ( $2 \times 10 \text{ mL}$ , 1 min), DCM ( $2 \times 10 \text{ mL}$ , 1 min) and DMF ( $2 \times 10 \text{ mL}$ , 1 min)

Until getting tetrapeptide $\mathbf{6}$  (Fmoc-L-Ile-L-Ser-D-Thr-L-Ala-OH), mini-cleavage was performed in order to monitor the esterification step

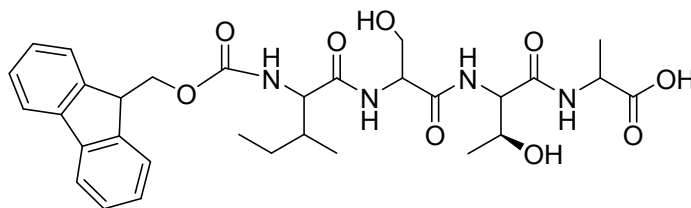

Molecular Weight: 612.67

HPLC chromatogram of Fmoc-L-Ile-L-Ser-D-Thr(OH)-L-Ala-OH:

A linear gradient of 5–95%  $\text{CH}_3\text{CN}/\text{H}_2\text{O}$  and 0.1% TFA over 15 min was applied, with a flow rate of 1.0 mL/min and detection at 220 nm using a Phenomenex  $\text{C}_{18}$  ( $3 \mu\text{m}$ ,  $4.6 \times 50 \text{ mm}$ ) column.

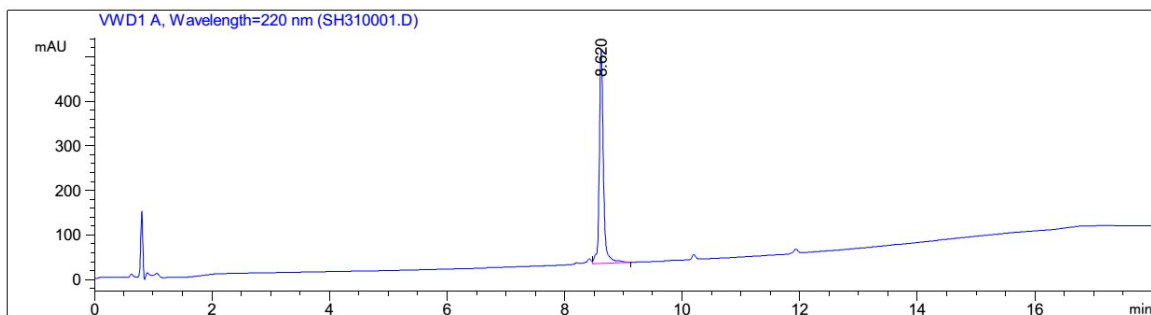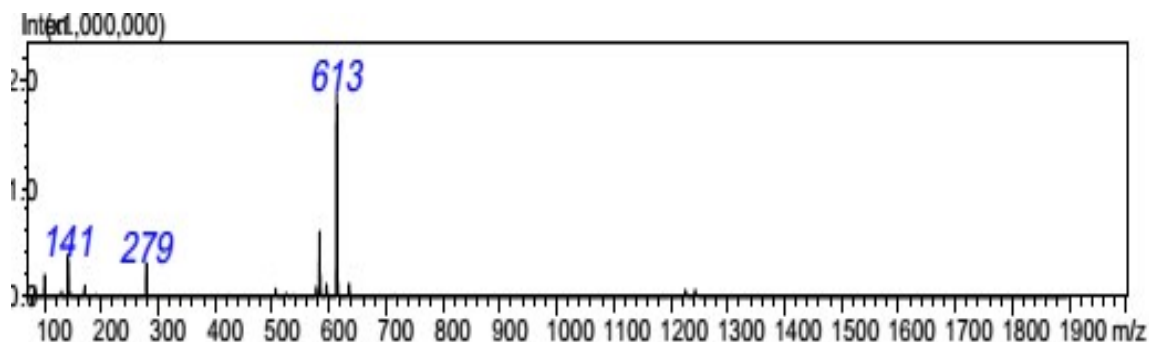

## b) Ester-bond formation

The ester bond formation was achieved by using the following condition: Alloc-L-Ile-OH (215 mg, 1 mmol, 10equiv), DIC (77  $\mu$ L, 0.5 mmol, 5 equiv) and DMAP (12 mg, 0.1 mmol, 1 equiv) in DCM/DMF (8:2) ( $2 \times 2$  h).

HPLC chromatogram of Fmoc-L-Ile-L-Ser-D-Thr(Alloc-L-Ile)-L-Ala-OH:

A linear gradient of 5–95%  $\text{CH}_3\text{CN}/\text{H}_2\text{O}$  and 0.1% TFA over 15 min was applied, with a flow rate of 1.0 mL/min and detection at 220 nm using a Phenomenex  $\text{C}_{18}$  (3  $\mu\text{m}$ , 4.6  $\times$  50 mm) column.

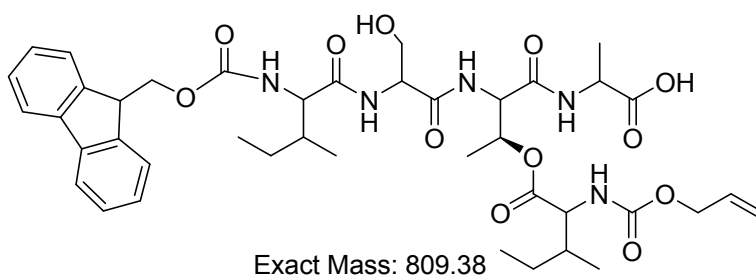

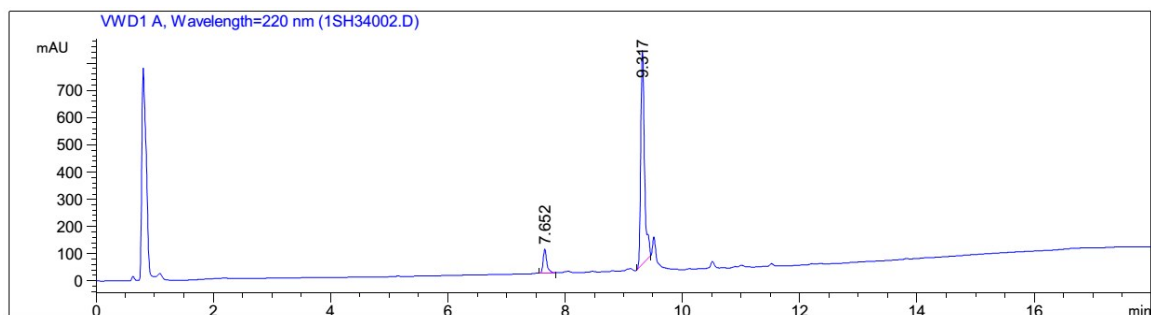

MS

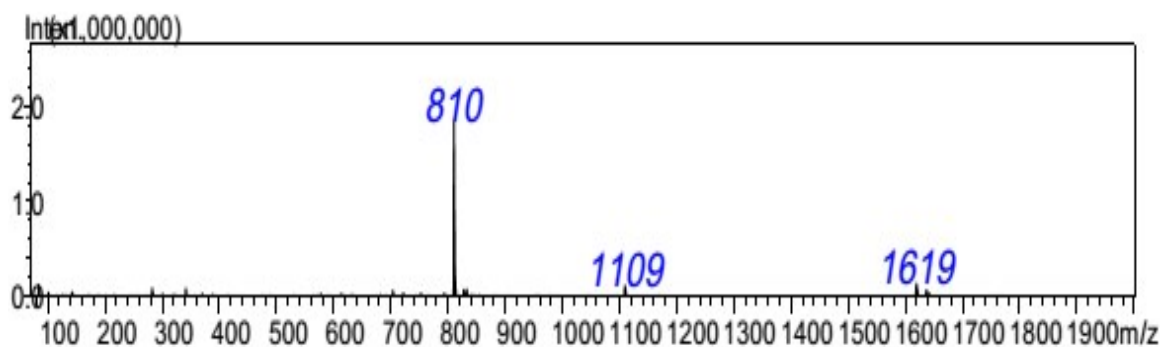

### c) Synthesis of protected precursor peptide:

The resin was dried under vacuum and transferred onto microwave vial shielded from light by aluminum foil. Then, A solution of phenylsilane (124  $\mu$ L, 1 mmol, 10 equiv) and a catalytic amount of tetrakis(triphenylphosphine) palladium (0) (11 mg, 0.01 mmol, 0.1 equiv) in dry DCM (1 mL) was added. The reaction vessel was flushed with nitrogen and shaken for 15 min. Mini-cleavage was performed in order to control the reaction

HPLC chromatogram of 5-mer depsipeptide after Alloc deprotection:

A linear gradient of 5–95%  $\text{CH}_3\text{CN}/\text{H}_2\text{O}$  and 0.1% TFA over 15 min was applied, with a flow rate of 1.0 mL/min and detection at 220 nm using a Phenomenex  $\text{C}_{18}$  (3  $\mu\text{m}$ , 4.6  $\times$  50 mm) column

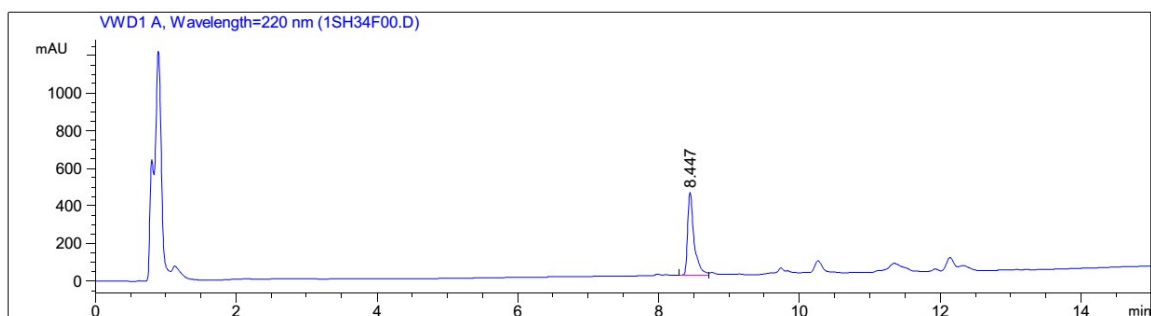

Then, Alloc-L-Arg(Pbf)-OH was added to the resin followed by removal of the Fmoc group and adding the following building blocks on the same order using the same protocol that mentioned above: Fmoc-L-Ile-OH, Fmoc-L-Gln(Trt)-OH, Fmoc-L-Ser(<sup>t</sup>Bu)-OH, Fmoc-L-Ile-OH and Boc-L-*N*-Me-Phe-OH in case **2b**, and Fmoc-D-*allo*-Ile-OH, Fmoc-D-Gln(Trt)-OH, Fmoc-L-Ser(<sup>t</sup>Bu)-OH, Fmoc-L-Ile-OH and Fmoc-D-Phe-OH in case **3a**.

In case of **3a**: the acetylation on D-Phe takes place after Fmoc deprotection using 20% piperidine in DMF, followed by acylation with acetic acid in presence of K-oxyma and DIC (3:3:6) for 2h.

For both **2b** and **3a**: Alloc deprotection takes place to give the free L-Arg(Pbf)-OH before cyclization. The resin was dried under vacuum and treated with 1 % TFA in DCM (5 × 30 s) and collected over water. Then, TFA and DCM were evaporated, and then lyophilization takes place to get the protected powder before cyclization.

#### d) Cyclization and removing of all protecting groups:

##### 2b (L-teixobactin) analogue

In 1000 mL round flask, DIEA (52  $\mu$ L, 0.05 mmol, 6 equiv), Oxyma Pure (21.3 mg, 0.05 mmol, 3 equiv) and 500 mL DCM were added to 11-mer depsipeptide (98.47 mg, 0.05mmol) in 1 mL DMF. Then, it cooled to 0 °C by ice bath followed by adding PyAOP (78.2 mg, 0.05 mmol, 3equiv) to the reaction mixture. The reaction was stirred 24h.

##### MALDI before cyclization with all protecting groups:[M+Na]

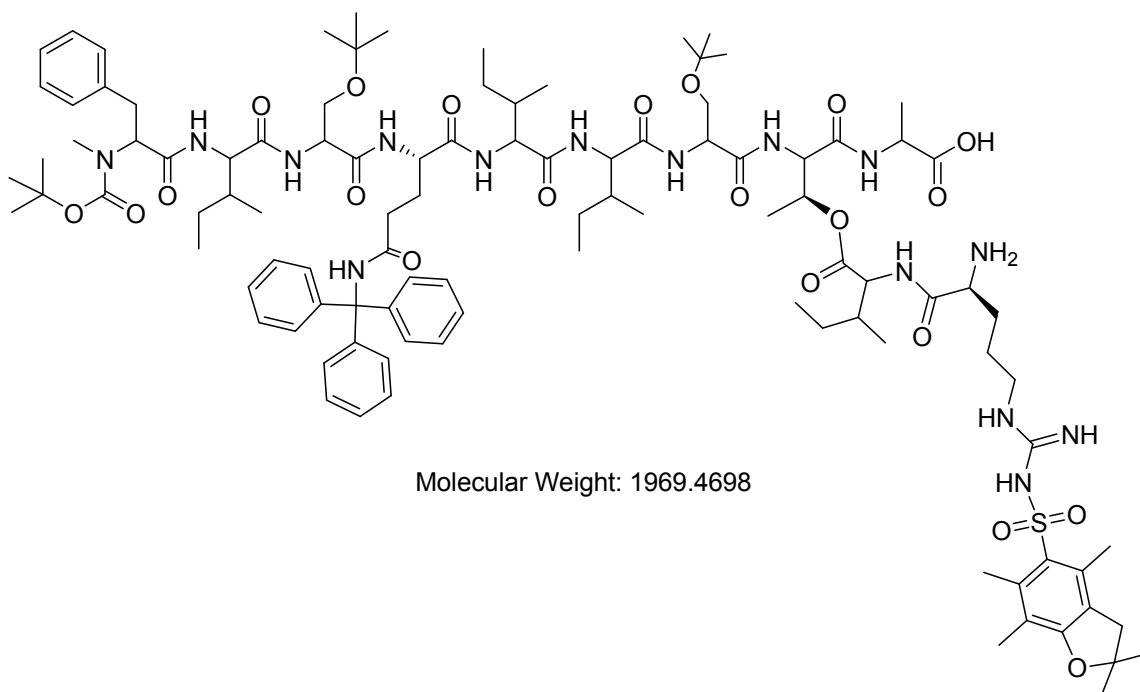

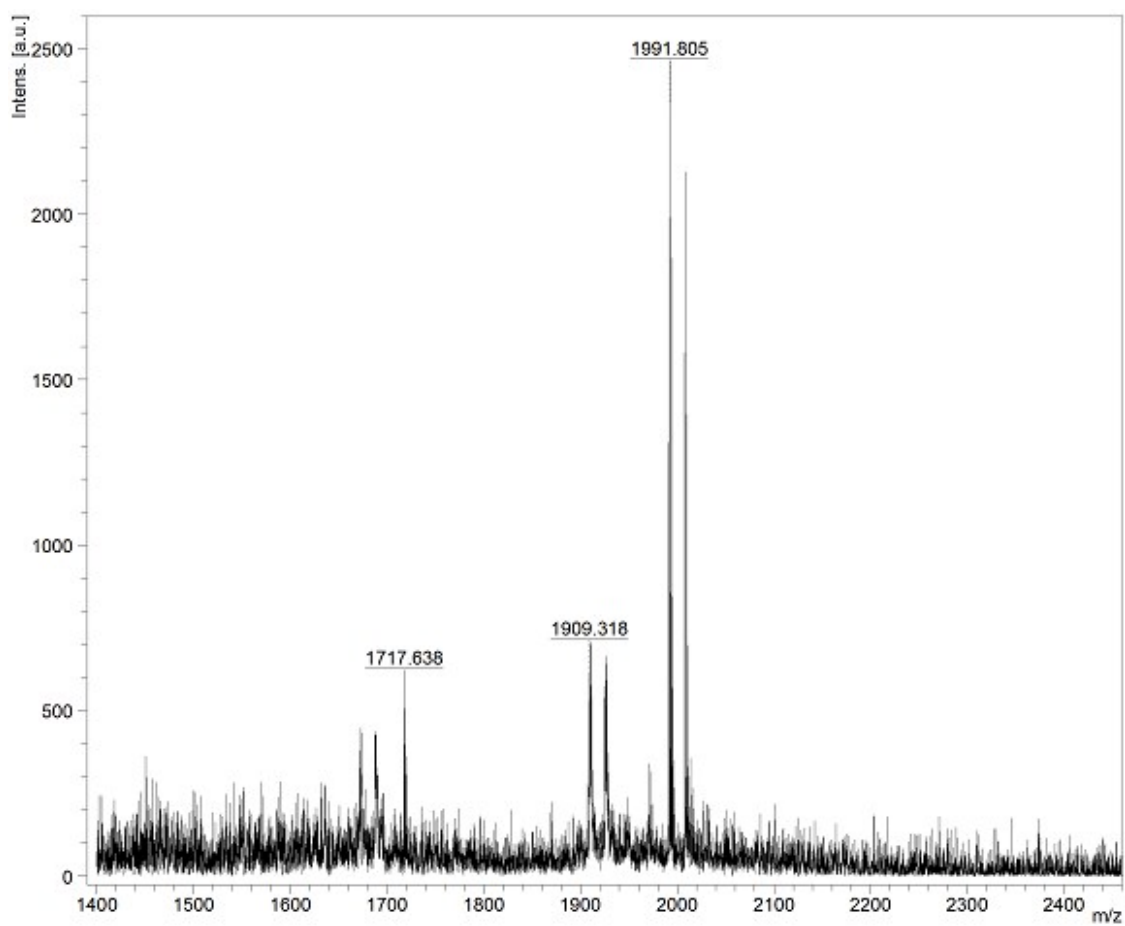

**MALDI after cyclization with all protecting groups: [M+Na]**

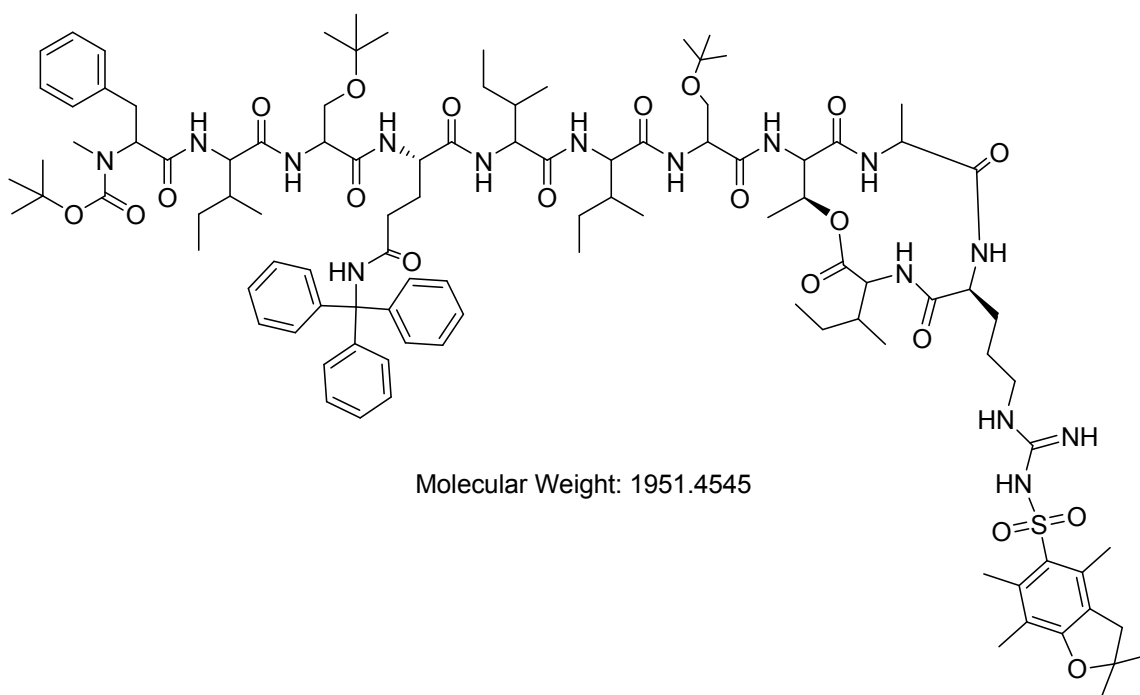

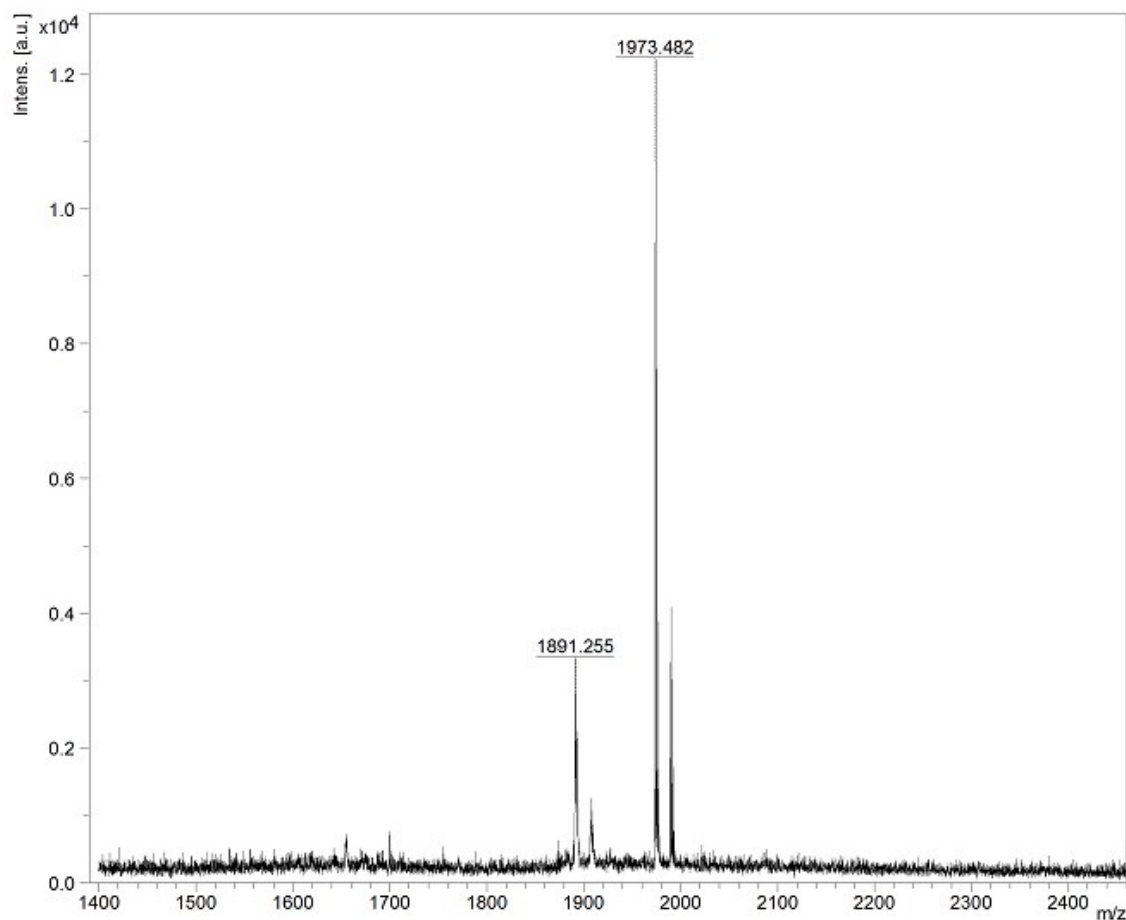

### **3a (Ac-D-Phe-teixobactin) analogue**

In 1000 mL round flask, DIEA (58  $\mu$ L, 0.05 mmol, 6 equiv), Oxyma Pure (23.3 mg, 0.05 mmol, 3 equiv) and 556 mL DCM were added to Ac- 11-mer depsipeptide (105.5 mg, 0.05mmol) in 1 mL DMF. Then, it cooled to 0  $^{\circ}$ C by ice bath followed by adding PyAOP (86.2 mg, 0.05 mmol, 3equiv) to the reaction mixture. The reaction was stirred 24h.

**MALDI before cyclization with all protecting groups: [M+Na]**

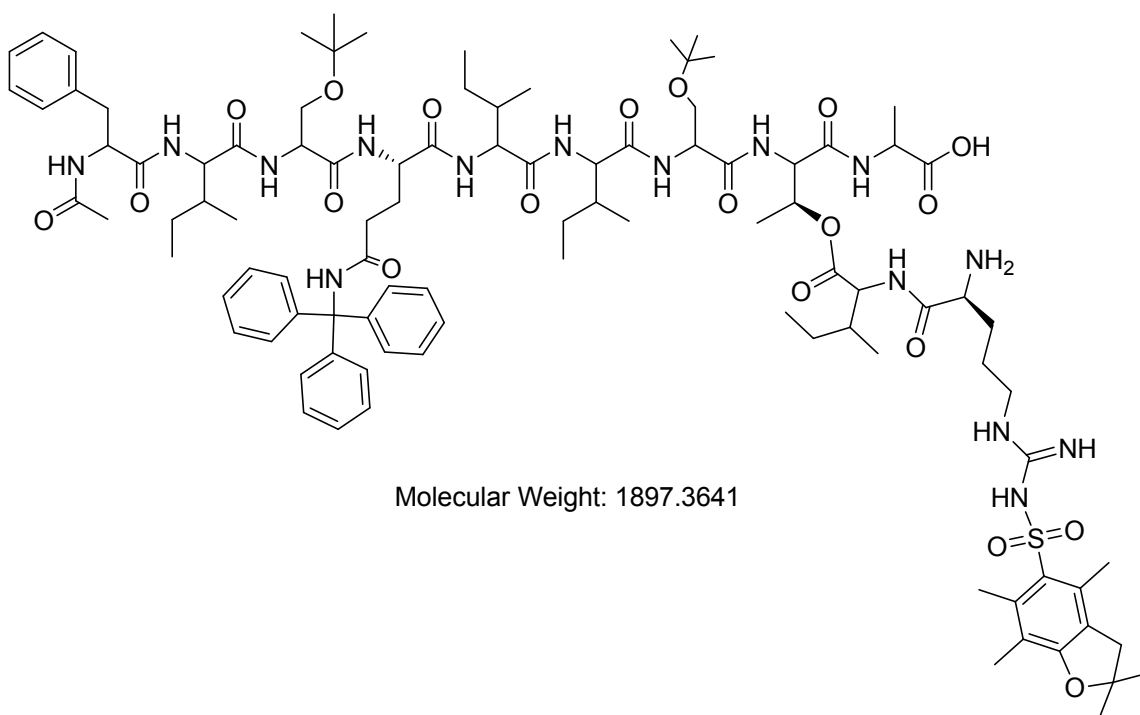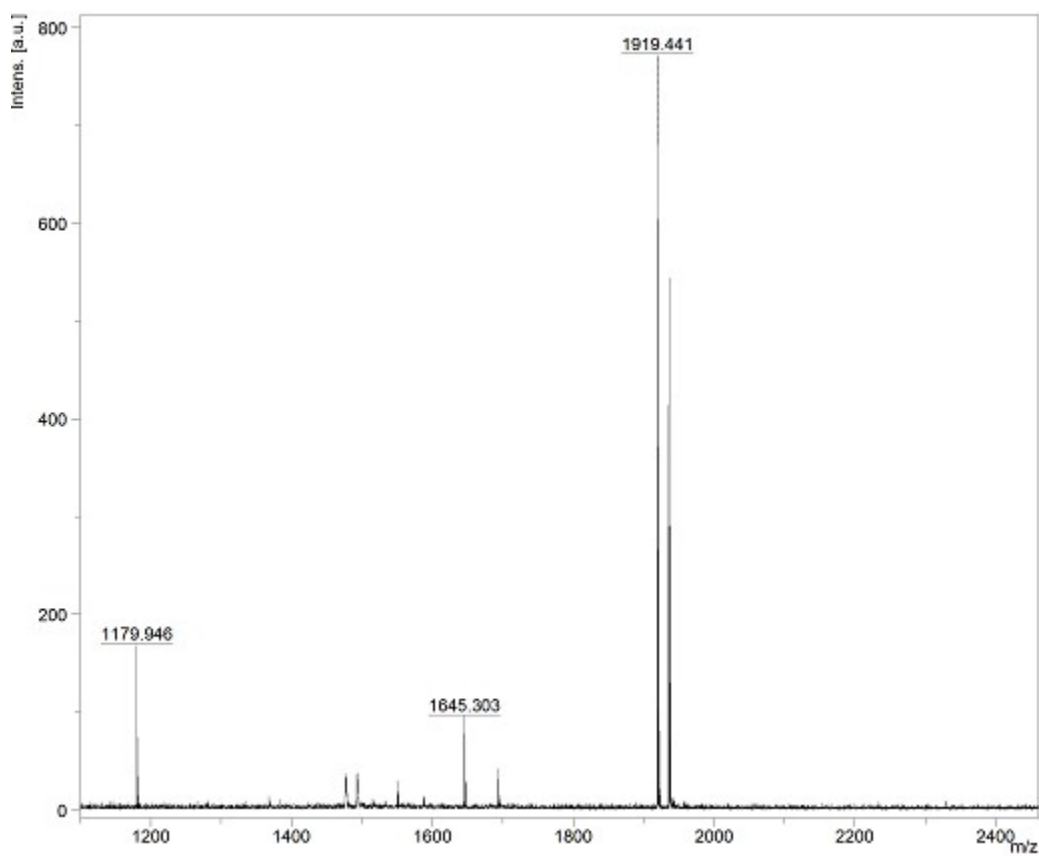

**MALDI after cyclization with all protecting groups: [M+Na]**



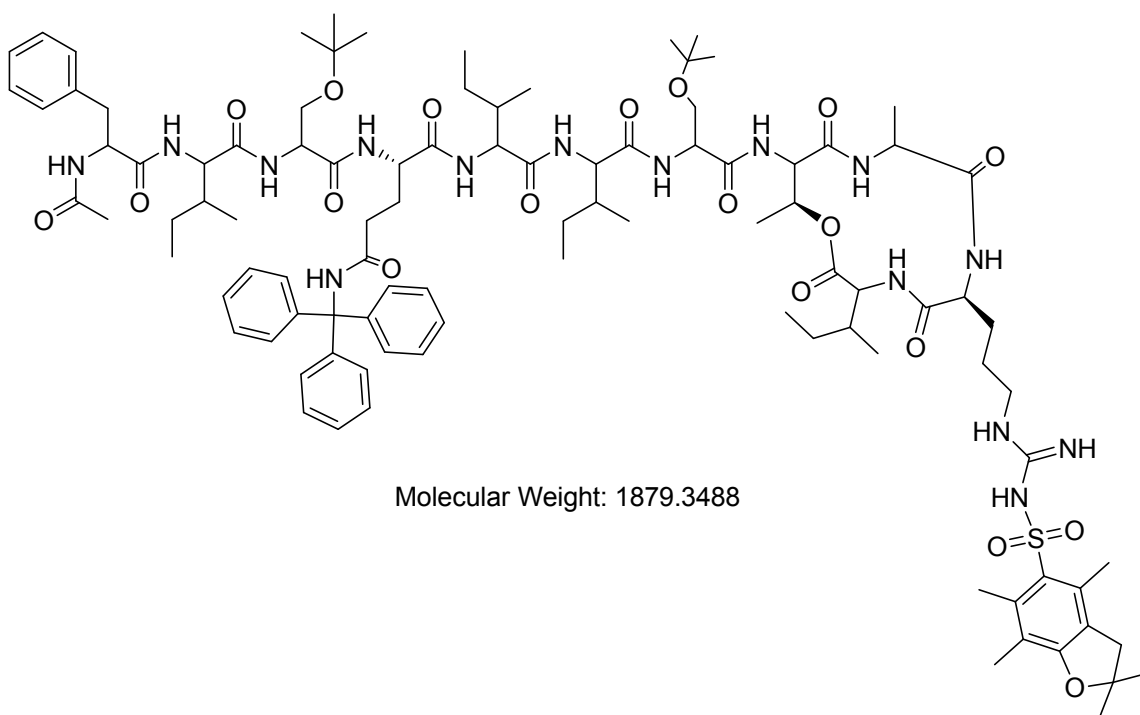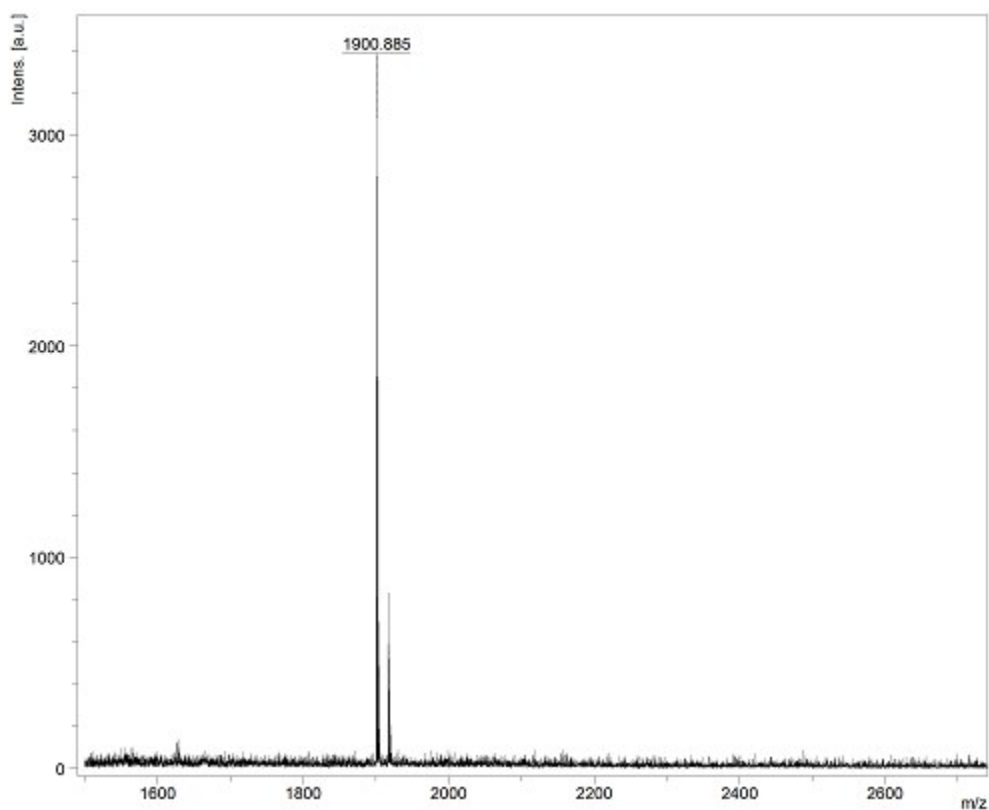

Then, DCM was removed by rotary evaporator while DMF was removed using phase drying. 5 mL of the TFA/TIS/H<sub>2</sub>O (95:2.5:2.5) was added and stirred for 4 h. The solvent and residues from the cleavage cocktail were concentrated under nitrogen. The crude

peptide was precipitated with cold Et<sub>2</sub>O (3 × 10 mL). The crude peptide was confirmed by HPLC and MALDI-TOF.

The crude peptide was purified by prep-HPLC

Condition:

A linear gradient of 25–50% for **2b** and 30–50% for **3a** CH<sub>3</sub>CN/H<sub>2</sub>O and 0.1% TFA over 30 min was applied, with a flow rate of 15.0 mL/min and detection at 220 nm using a PhenomenexLumaC<sub>18</sub>(2) column (10 μm, 21.1 × 250 mm).

HPLC of the pure final product:

### **2b (L-teixobactin) analogue**

A linear gradient of 25–50% CH<sub>3</sub>CN/H<sub>2</sub>O and 0.1% TFA over 15 min was applied, with a flow rate of 1.0 mL/min and detection at 220 nm using a Phenomenex C<sub>18</sub> (3 μm, 4.6 × 50 mm) column, *t<sub>R</sub>* = 3.59 min

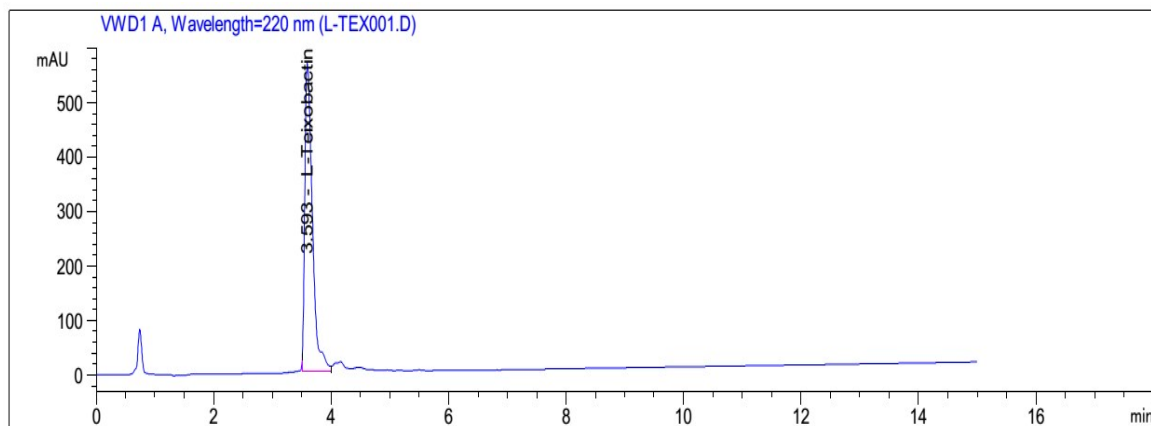

### **3a (Ac-D-Phe-teixobactin) analogue**

A linear gradient of 30–50% CH<sub>3</sub>CN/H<sub>2</sub>O and 0.1% TFA over 15 min was applied, with a flow rate of 1.0 mL/min and detection at 220 nm using a Phenomenex C<sub>18</sub> (3 μm, 4.6 × 50 mm) column, *t<sub>R</sub>* = 6.12 min

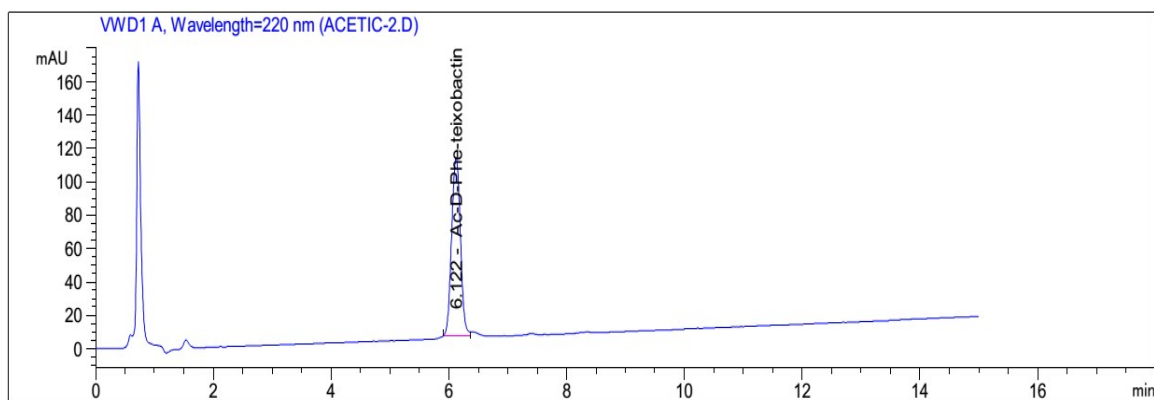

## MALDI-TOF

### 2b (L-teixobactin) analogue

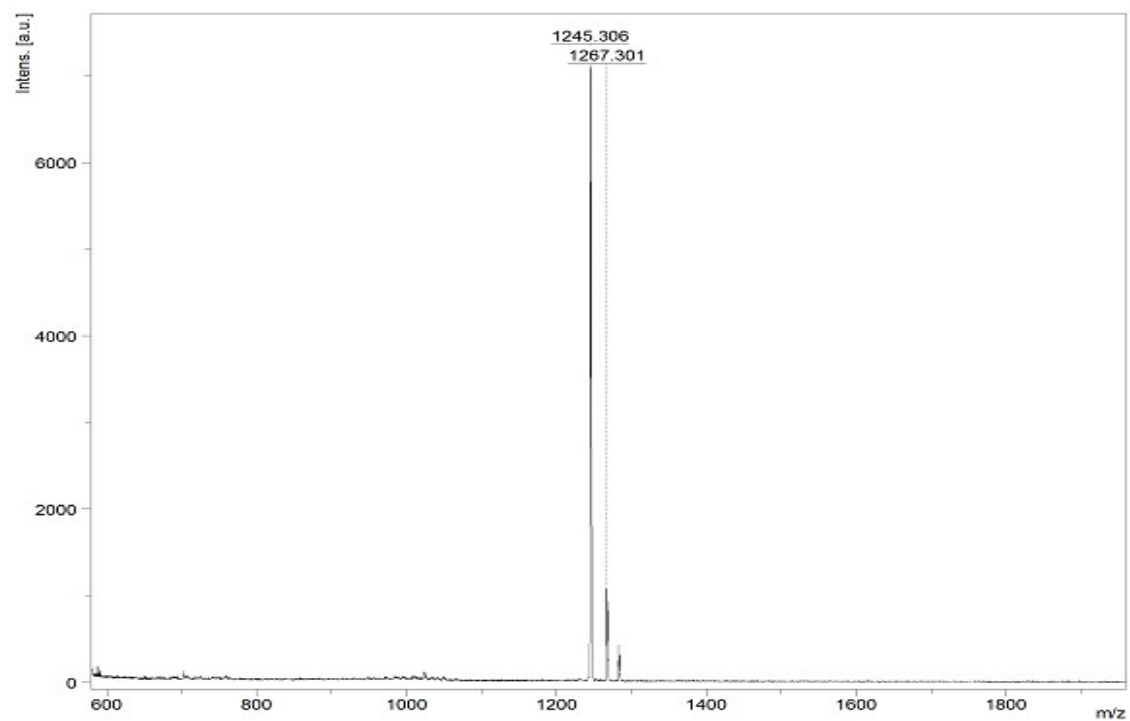

### 3a (Ac-D-Phe-teixobactin) analogue

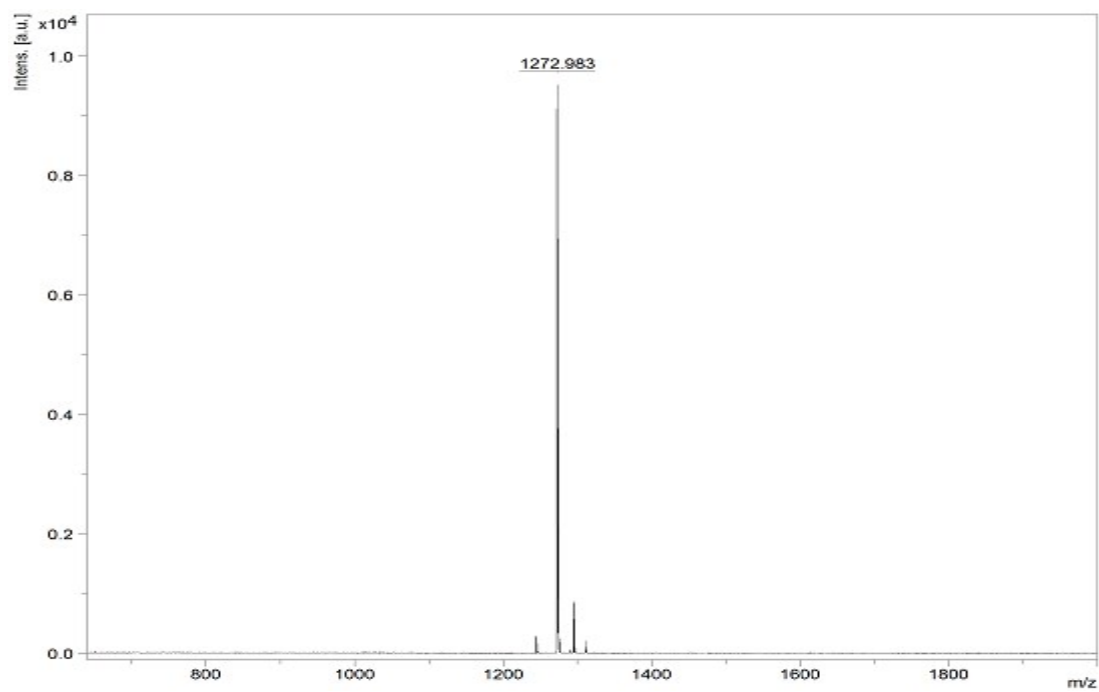

## HRMS

### **2b (L-teixobactin) analogue**

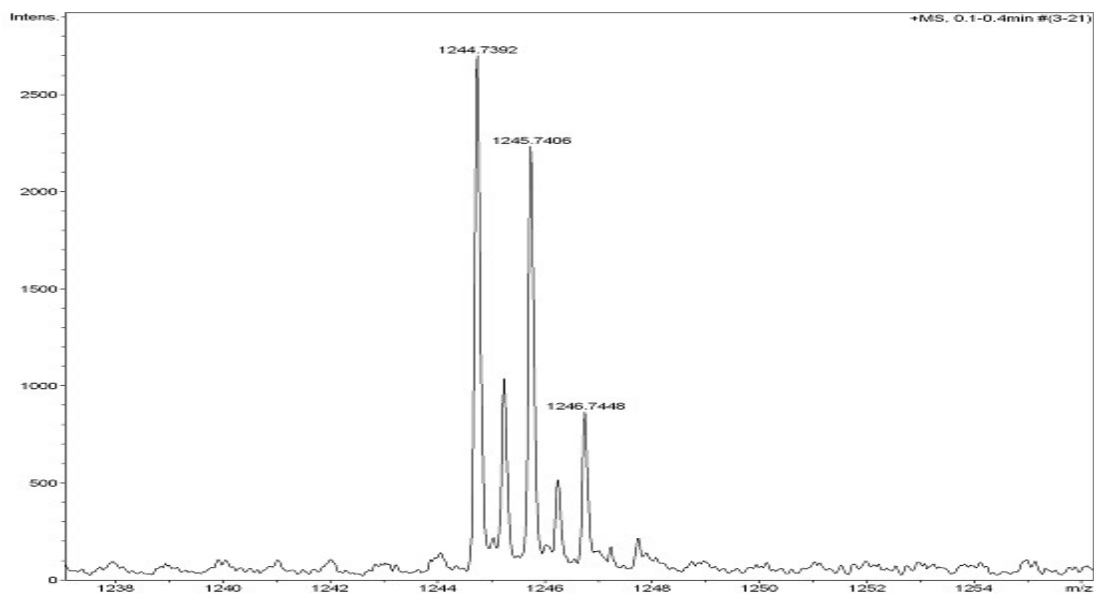

Expected exact mass of **2b** ( $C_{58}H_{97}N_{15}O_{15}$ )  $[M+H]^+$ : 1244.7361 Da

Observed exact mass of **1**  $[M+H]^+$ : 1244.7392 Da

Error = 1.8 ppm

### **3a (Ac-D-Phe-teixobactin) analogue**

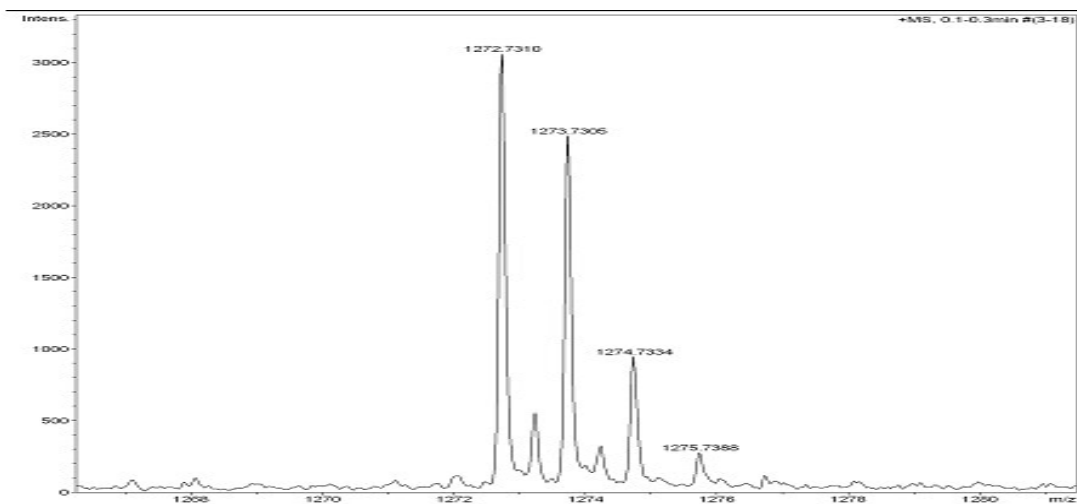

Expected exact mass of **3a** ( $C_{59}H_{97}N_{15}O_{16}$ )  $[M+H]^+$ : 1272.7310 Da

Observed exact mass of **1**  $[M+H]^+$ : 1272.7310 Da

Error = 0.0 ppm

## Biological activity

### Compounds and Reference bacterial strains

The compound was dissolved in sterile distilled water. The ATCC bacterial strains (2 Gram positive and 2 Gram negative) were subcultured onto Mueller Hinton agar and incubated at 37°C for 24 hours prior to use in the experiments.

### Minimum Inhibitory Concentration (MIC) determination<sup>3</sup>

The MIC was determined using the broth micro dilution method as described by the Clinical and Laboratory Standards Institute (CLSI) guidelines. Briefly, two-fold serial dilutions of each drug/compound were done in cation adjusted Mueller Hinton broth (CAMHB) in a 96 well microtitre plate. The bacterial inoculum was prepared in distilled water and matched to a 0.5 McFarland standard and added to make a final volume of 200µl in each microtitre well. The plates were incubated for 24 hours at 37 °C under aerobic conditions. The MIC was then recorded, as the lowest concentration at which there was no visible growth. A drug free and media control wells containing bacteria and CAMHB respectively were included in each plate. Meropenem was also tested as drug control. The assay was done in duplicate to confirm results

- 1 P. Gomez-Martinez, M. Dessolin, F. Guibé, F. Albericio, *Journal of the Chemical Society, Perkin Transactions I* 1999, 2871-2874.
- 2 Y. E. Jad, G. A. Acosta, T. Naicker, M. Ramtahal, A. El-Faham, T. Govender, H. G. Kruger, B. G. d. l. Torre, F. Albericio, *Organic letters* 2015.
- 3 Clinical and Laboratory Standards Institute, 2012. Methods for dilution antimicrobial susceptibility tests for bacteria that grow aerobically; approved standard 8th ed. CLSI publication M07-A9. Clinical Laboratory Standard Institute, Wayne, PA
